# Supplementary material
Source: Royal Society of Chemistry journal article supplement (doi:10.1039/d5mh02449h)
Supplement: d5mh02449h1.pdf [file d5mh02449h1.pdf]

## Supporting Information

### Green surface-engineered bio-acrylate architectures for high-efficiency triboelectric energy harvesting

Maksims Jurinovs<sup>a</sup>, Linards Lapčinskis<sup>b</sup>, Līva Ģērmāne<sup>b</sup>, Janis Lungevics<sup>c</sup>, Kaspars Pudžs<sup>d</sup>, Jihun Choi<sup>e,f</sup>, Yebin Lee<sup>e,f</sup>, Sergejs Gaidukovs<sup>a\*</sup>, Chang Kyu Jeong<sup>e,f\*</sup>, Andris Šutka<sup>b\*</sup>

<sup>a</sup>*Institute of Chemistry and Chemical Technology, Faculty of Natural Sciences and Technology, Riga Technical University, P. Valdena Str. 3, LV-1048, Riga, Latvia.*

<sup>b</sup>*Institute of Materials and Surface Engineering, Faculty of Natural Sciences and Technology, Riga Technical University, P. Valdena 3, Riga 1048, Latvia.*

<sup>c</sup>*Mechanical and Biomedical Engineering Institute, Faculty of Civil and Mechanical Engineering, Riga Technical University, Kipsalas 6B, Riga 1048, Latvia*

<sup>d</sup>*Institute of Solid State Physics, University of Latvia, Kengaraga Street 8, Riga 1063, Latvia*

<sup>e</sup>*Division of Advanced Materials Engineering & Department of JBNU-KIST Industry-Academia Convergence Research, Jeonbuk National University, Jeonju, Jeonbuk 54896, Republic of Korea*

<sup>f</sup>*Department of Energy Storage/Conversion Engineering of Graduate School (BK21 FOUR) & Hydrogen and Fuel Cell Research Center, Jeonbuk National University, Jeonju, Jeonbuk 54896, Republic of Korea*

\* Corresponding authors: ckyu@jbnu.ac.kr, Sergejs.Gaidukovs@rtu.lv; Andris.Sutka@rtu.lv

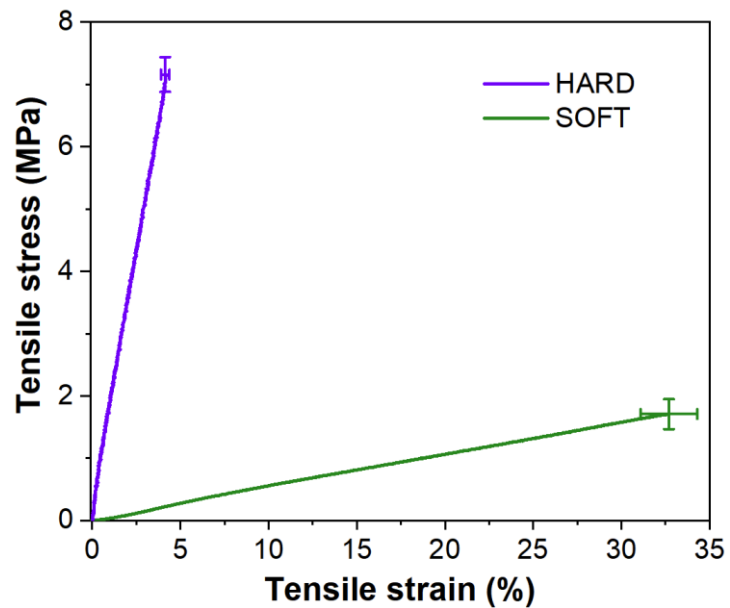

Fig. S1. Stress-Strain curves of UV-cured films samples

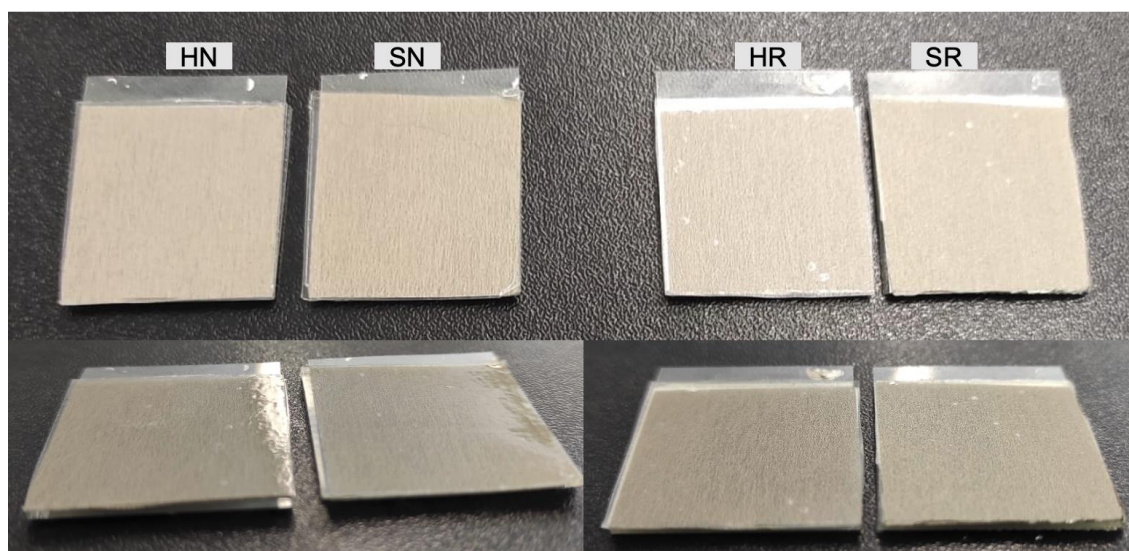

Fig. S2. Photos of the prepared samples at different angles

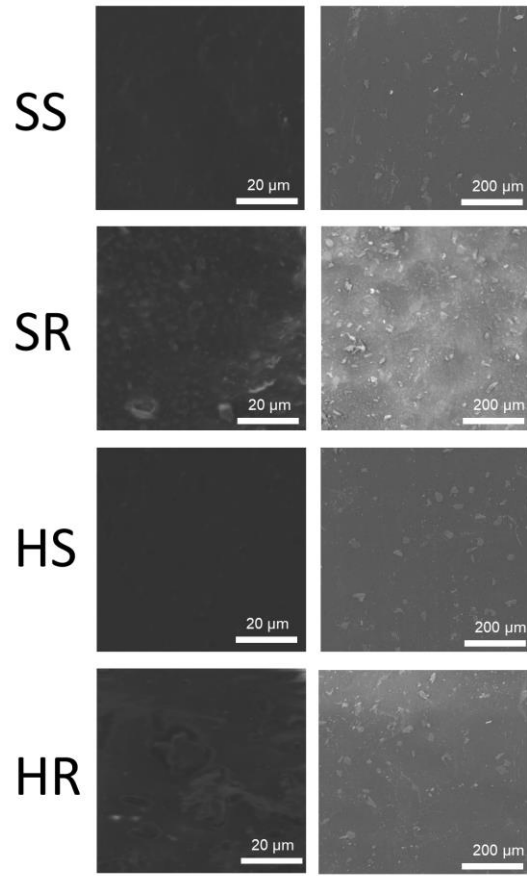

**Fig. S3.** SEM images of the samples surfaces

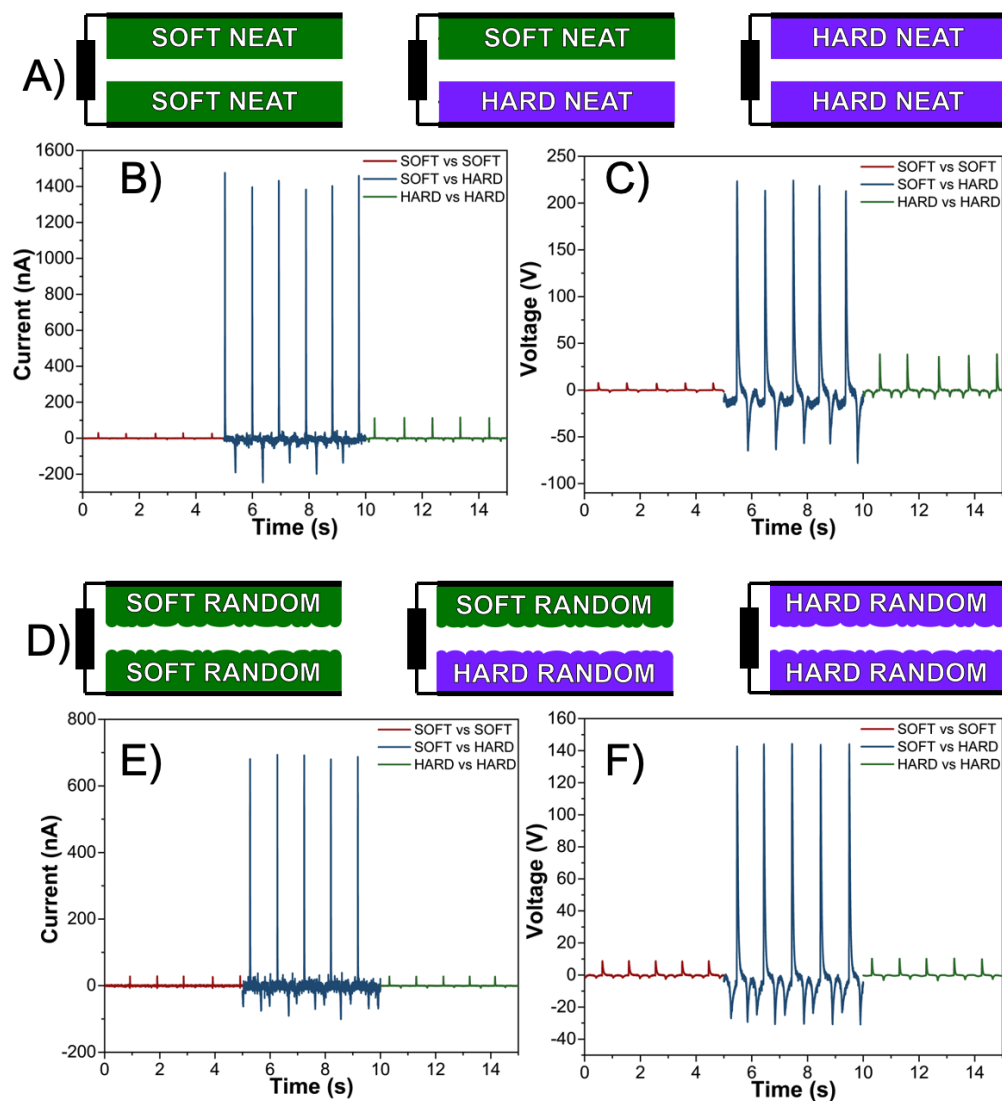

**Fig. S4.** (A) Schematics of tested contact pairs for films with neat surface pattern with the corresponding (B) short-circuit current, (C) open-circuit voltage (D) Followed by schematics of tested contact pairs for films with random surface pattern with the corresponding (E) short-circuit current, (F) open-circuit voltage.

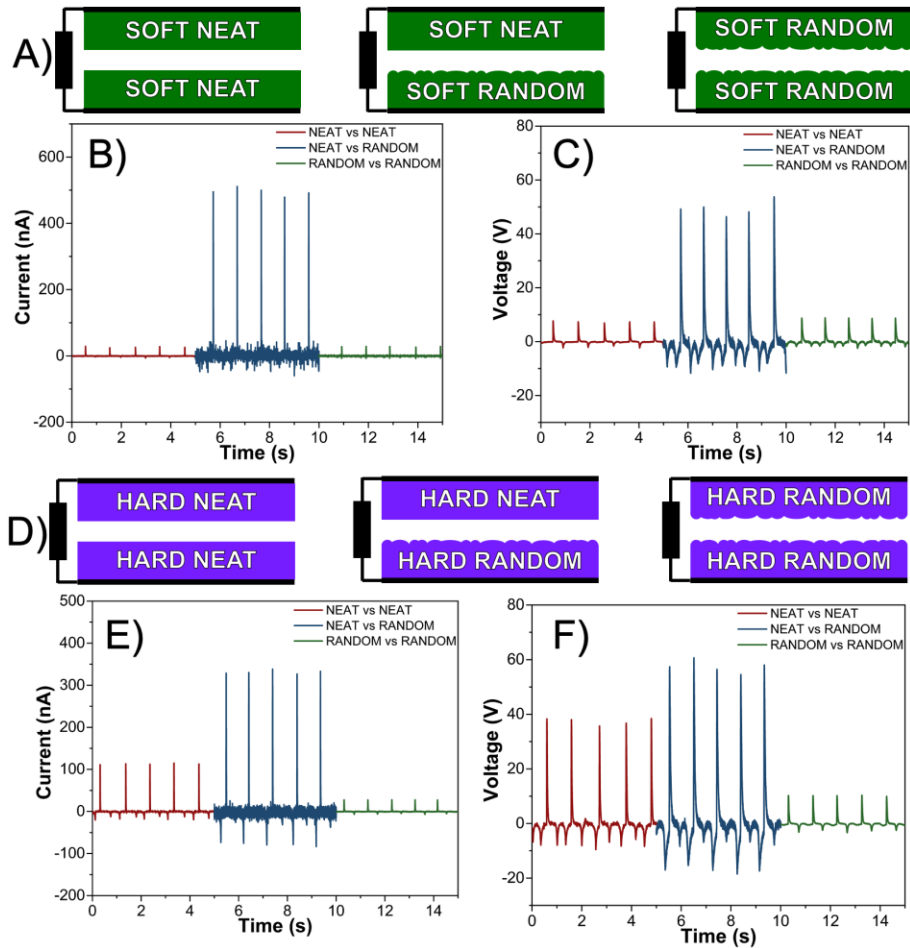

**Fig. S5.** (A) Schematics of tested contact pairs for films with various surface patterns using the soft polymer with (B) the corresponding short-circuit current, (C) open-circuit voltage. (E) Schematics of tested contact pairs for films with various surface patterns using the hard polymer with (F) the corresponding short-circuit current, (G) open-circuit voltage.

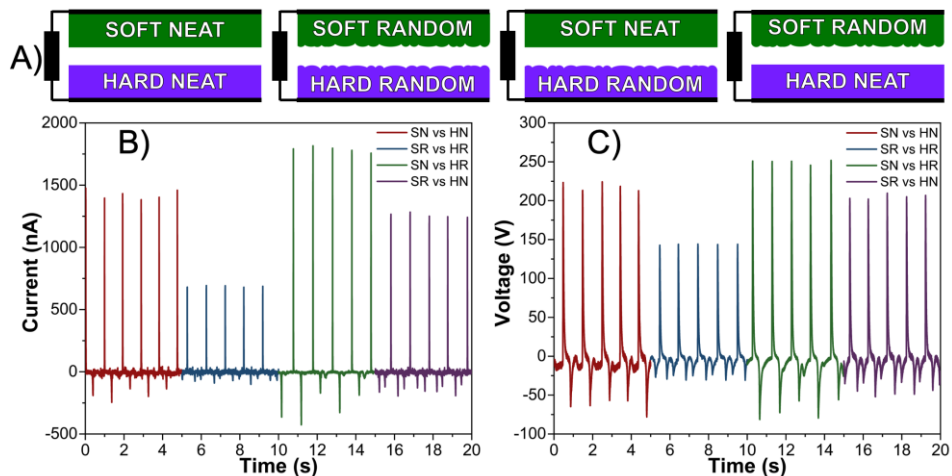

**Fig. S6.** (A) Schematics of tested contact pairs for films with various surface patterns from both soft and hard polymers with (B) the corresponding short-circuit current, (C) open-circuit voltage.

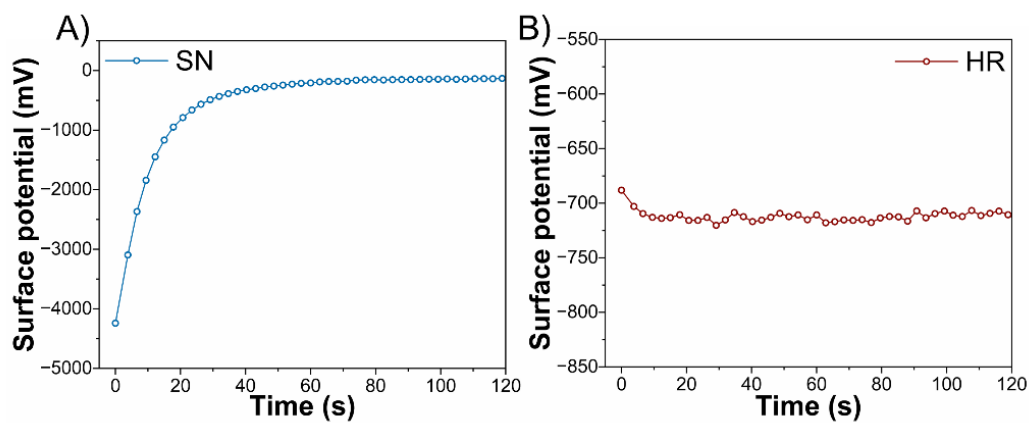

**Fig. S7.** Surface potential as a function of time for A) SN and B) HR after mutual contact-separation.

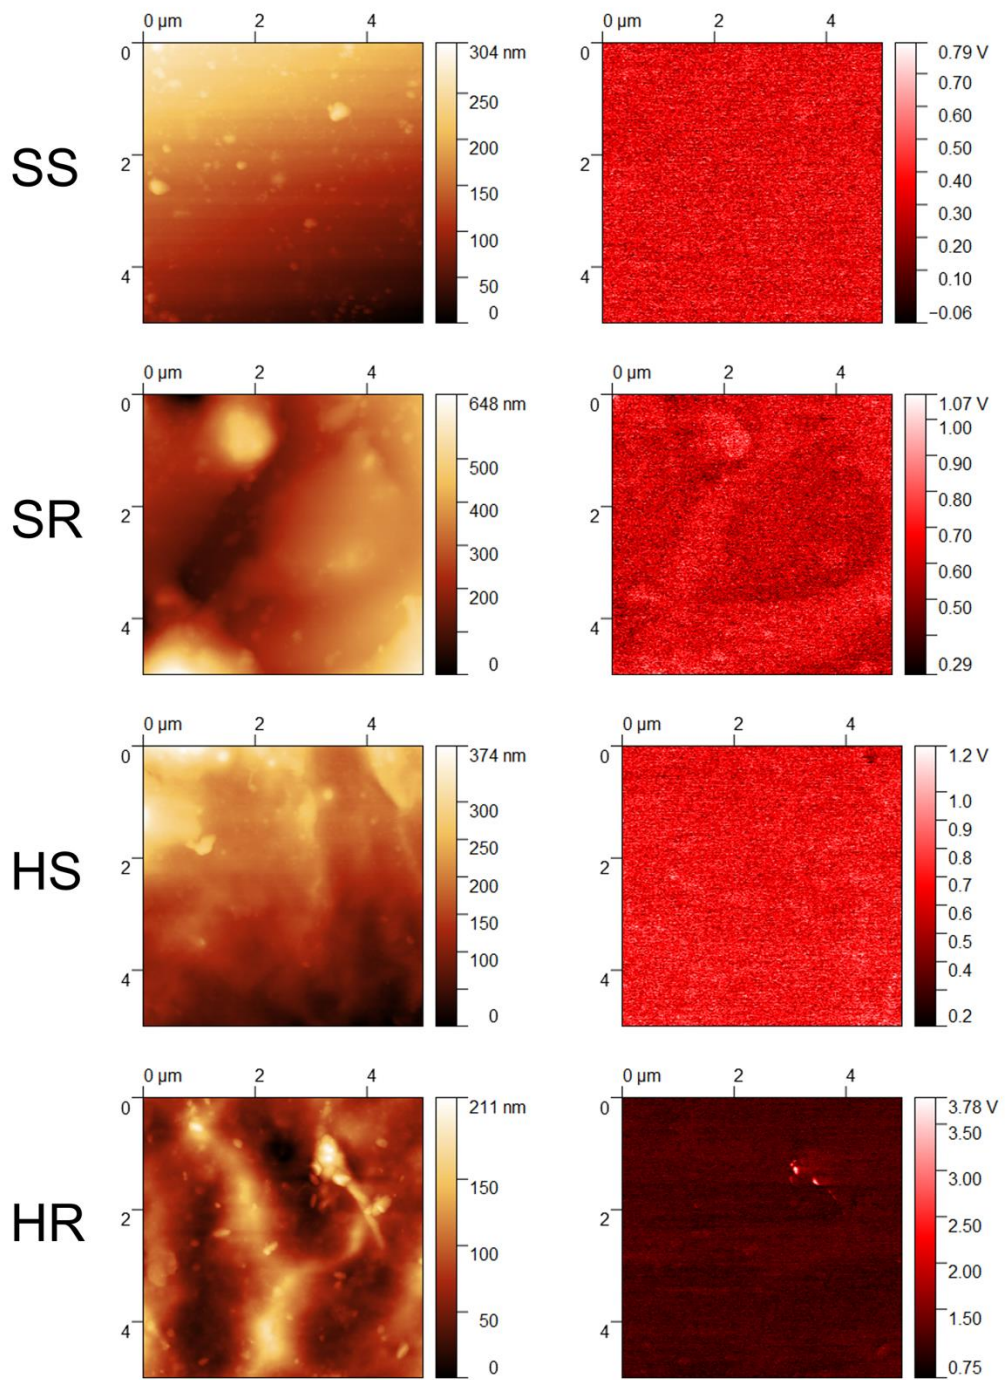

**Fig. S8.** KPFM scan images of all prepared films

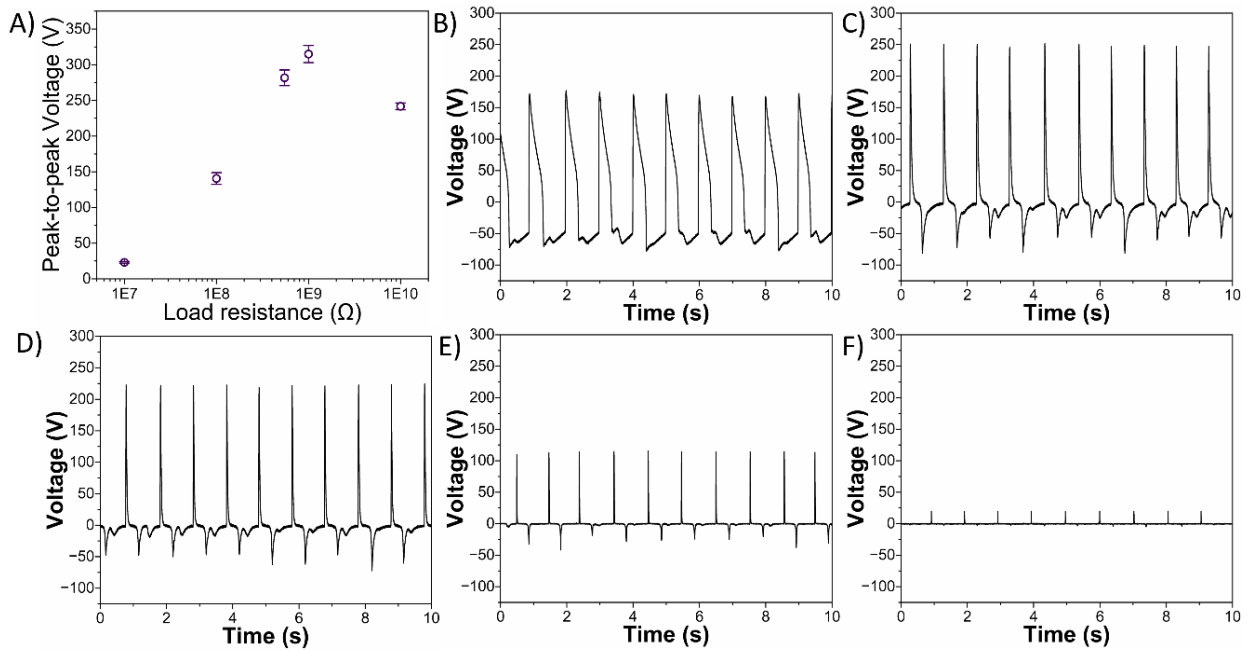

**Fig. S9.** Voltage as function of load resistance (from top left to bottom right - 10 GΩ, 1 GΩ, 550 MΩ, 100 MΩ and 10 MΩ) of the prepared bio-based TENG pair SN vs HR.

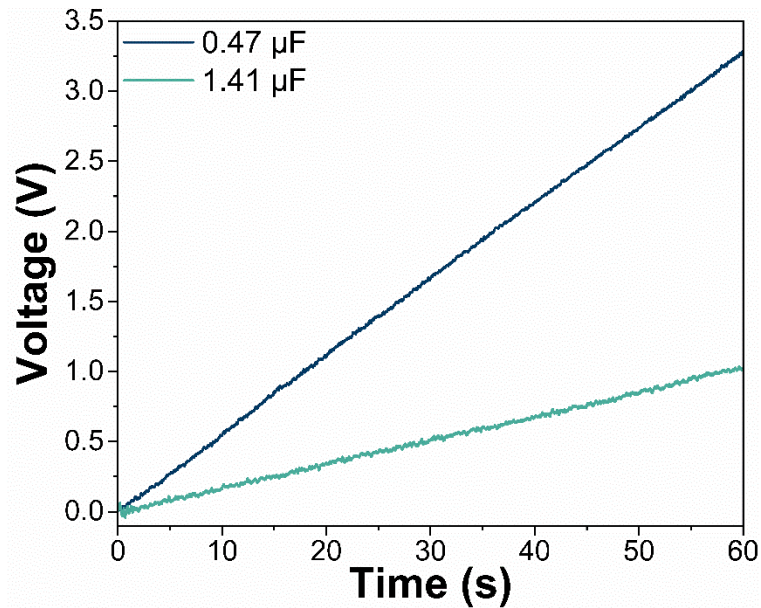

**Fig. S10.** Voltage across capacitors during 1 min of charging by pneumatic contact-separation device.

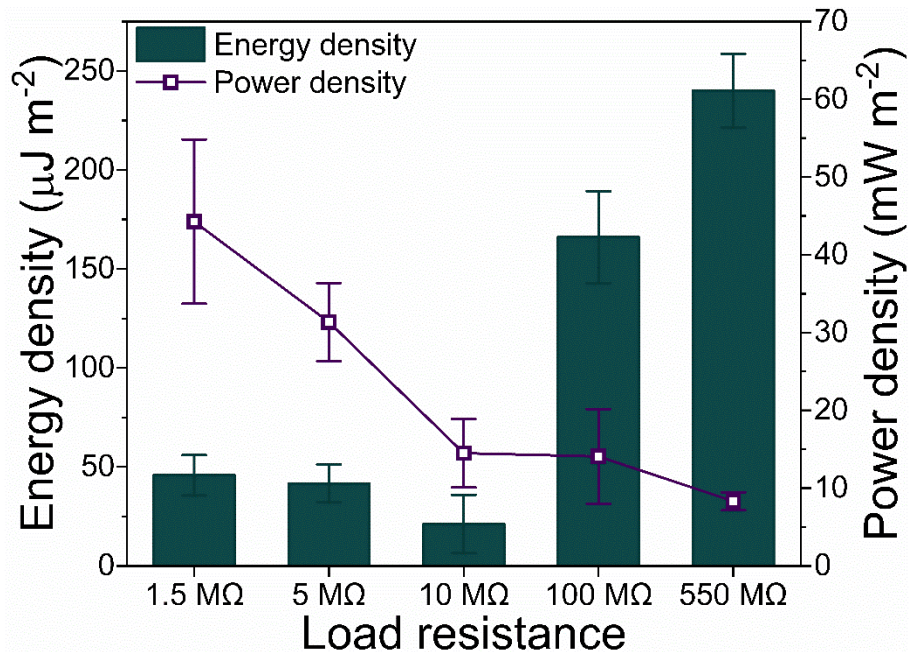

**Fig. S11.** Energy density and power density at different load resistance values for “SS vs. HR” configuration tested using pneumatic contact-separation device.

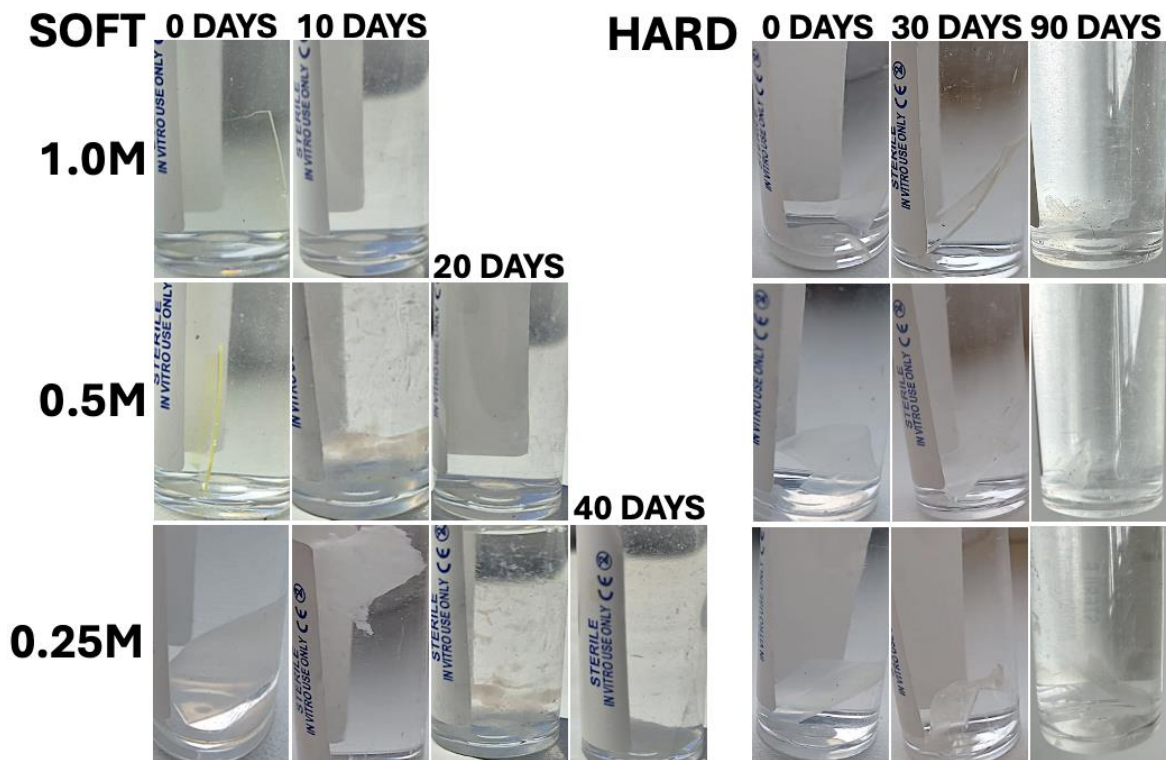

**Fig. S12.** Accelerated hydrolytic degradation time-line photos of UV-cured film samples until the end of experiment.

**Table S1.** Kelvin probe surface potential of prepared bio-based films

| Sample        | Surface potential before contact, mV |
|---------------|--------------------------------------|
| HN            | -280                                 |
| HR            | -276                                 |
| SN (3% PETMP) | -324                                 |
| SR            | -85                                  |
| SN (0% PETMP) | -288                                 |
| SN (5% PETMP) | -231                                 |
